# Supplementary material
Source: HighWire-hosted journal article supplement (http://www.qdcxjkg.com/highwire/filestream/113195/field_highwire_adjunct_files/0/Supplemental_Table_1_Bentley_et_al___European_Resp_Journal.pdf)
Supplement: Supplemental_Table_1_Bentley_et_al___European_Resp_Journal.pdf [file Supplemental_Table_1_Bentley_et_al___European_Resp_Journal.pdf]

Supplemental Table 1. The association of nutrients, and the interaction between nutrients and smoking status in predicting rate of decline in FEV<sub>1</sub> in the Health, Aging and Body Composition Study, Memphis, TN and Pittsburgh, PA; 1997-.

| Nutrient Model:                | Vitamin C                          |                 |         | Vitamin E                         |      |         | β-carotene                       |        |         | Fruits and Vegetables            |      |         |
|--------------------------------|------------------------------------|-----------------|---------|-----------------------------------|------|---------|----------------------------------|--------|---------|----------------------------------|------|---------|
|                                | β <sup>1</sup><br>(mls/yr)         | SE <sup>1</sup> | P value | β<br>(mls/yr)                     | SE   | P value | β<br>(mls/yr)                    | SE     | P value | β<br>(mls/yr)                    | SE   | P value |
| Cigarette Smoking <sup>2</sup> | <i>variable set, 3 df:</i> 0.03    |                 |         | <i>variable set, 3 df:</i> 0.06   |      |         | <i>variable set, 3 df:</i> 0.18  |        |         | <i>variable set, 3 df:</i> 0.22  |      |         |
| Continuous                     | -12.2                              | 11.1            | 0.27    | -4.6                              | 12.4 | 0.71    | 4.9                              | 10.4   | 0.64    | -15.5                            | 12.7 | 0.22    |
| Quit                           | -39.9                              | 18.3            | 0.03    | -51.5                             | 20.1 | 0.01    | -32.5                            | 17.4   | 0.06    | -22.2                            | 18.2 | 0.22    |
| Former                         | 7.1                                | 6.2             | 0.25    | 2.3                               | 5.2  | 0.66    | -5.2                             | 4.7    | 0.27    | 5.3                              | 6.6  | 0.43    |
| Nutrient (continuous)          | -0.02                              | 0.03            | 0.48    | 0.06                              | 0.27 | 0.82    | -0.0007                          | 0.0008 | 0.36    | -0.34                            | 0.79 | 0.66    |
| Smoking x Nutrient             | <i>variable set, 3 df:</i> <0.0001 |                 |         | <i>variable set, 3 df:</i> 0.0003 |      |         | <i>variable set, 3 df:</i> 0.003 |        |         | <i>variable set, 3 df:</i> 0.003 |      |         |
| Continuing Smoker              | 0.13                               | 0.07            | 0.07    | 0.89                              | 0.99 | 0.37    | -0.0002                          | 0.003  | 0.93    | 4.5                              | 2.5  | 0.07    |
| Quitter                        | 0.42                               | 0.11            | <0.0001 | 6.6                               | 1.6  | <0.0001 | 0.12                             | 0.005  | 0.0002  | 7.1                              | 2.7  | 0.008   |
| Former Smoker                  | -0.06                              | 0.04            | 0.09    | -0.33                             | 0.39 | 0.39    | 0.011                            | 0.0011 | 0.35    | -1.5                             | 1.2  | 0.21    |

<sup>1</sup>abbreviations: β, regression coefficient; SE, standard error of regression coefficient

<sup>2</sup>Smoking over follow-up period, reference: never smokers, regression coefficients are for the smoking\*time interaction, which conveys the effect of smoking on rate of decline

<sup>3</sup>variables also in the model: time, height, age, race, gender, site, education, family income, use of pulmonary drugs (and time interaction), calorie intake, current smoking dose
